# Supplementary material
Source: PubMed Central journal article supplement (PMC122923)
Supplement: pnas_092141999_7.pdf [file pnas_092141999_7.pdf]

Table 1. CD40 upregulation on *Listeria*-infected bone marrow-derived macrophages by IFN- $\gamma$ , activation-induced, T cell-derived, and chemokine-related cytokine (ATAC), macrophage inflammatory protein (MIP)-1 $\alpha$ , MIP-1 $\beta$ , and regulated on activation normal T cell expressed and secreted (RANTES)

| <b>BMM treatment</b>                                                             | <b>CD40,<br/>mean fluorescence intensity</b> |
|----------------------------------------------------------------------------------|----------------------------------------------|
| Resting                                                                          | 12                                           |
| <i>Listeria</i>                                                                  | 115                                          |
| <i>Listeria</i> + IFN- $\gamma$                                                  | 286                                          |
| <i>Listeria</i> + IFN- $\gamma$ + ATAC + MIP-1 $\alpha$ + MIP-1 $\beta$ + RANTES | 497                                          |
| <i>Listeria</i> + IFN- $\gamma$ + MIP-1 $\alpha$ + MIP-1 $\beta$ + RANTES        | 384                                          |
| <i>Listeria</i> + IFN- $\gamma$ + ATAC + MIP-1 $\beta$ + RANTES                  | 348                                          |
| <i>Listeria</i> + IFN- $\gamma$ + ATAC + MIP-1 $\alpha$ + RANTES                 | 446                                          |
| <i>Listeria</i> + IFN- $\gamma$ + ATAC + MIP-1 $\alpha$ + MIP-1 $\beta$          | 442                                          |
| <i>Listeria</i> + ATAC + MIP-1 $\alpha$ + MIP-1 $\beta$ + RANTES                 | 276                                          |

The data represent a more detailed analysis of the experiment shown in Fig. 4. The results are representative of five independent experiments.
