# Supplementary material
Source: PubMed Central journal article supplement (PMC122923)

**A**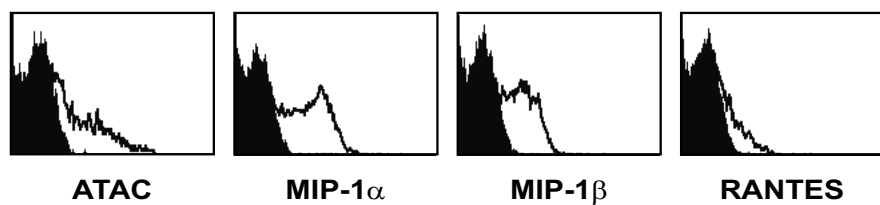**B**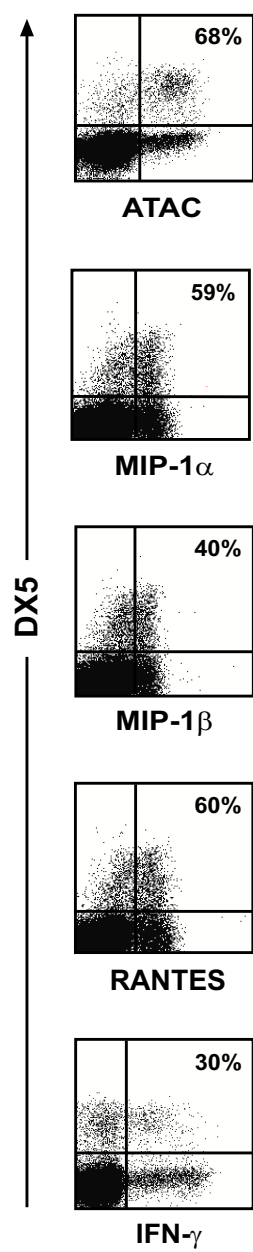**C**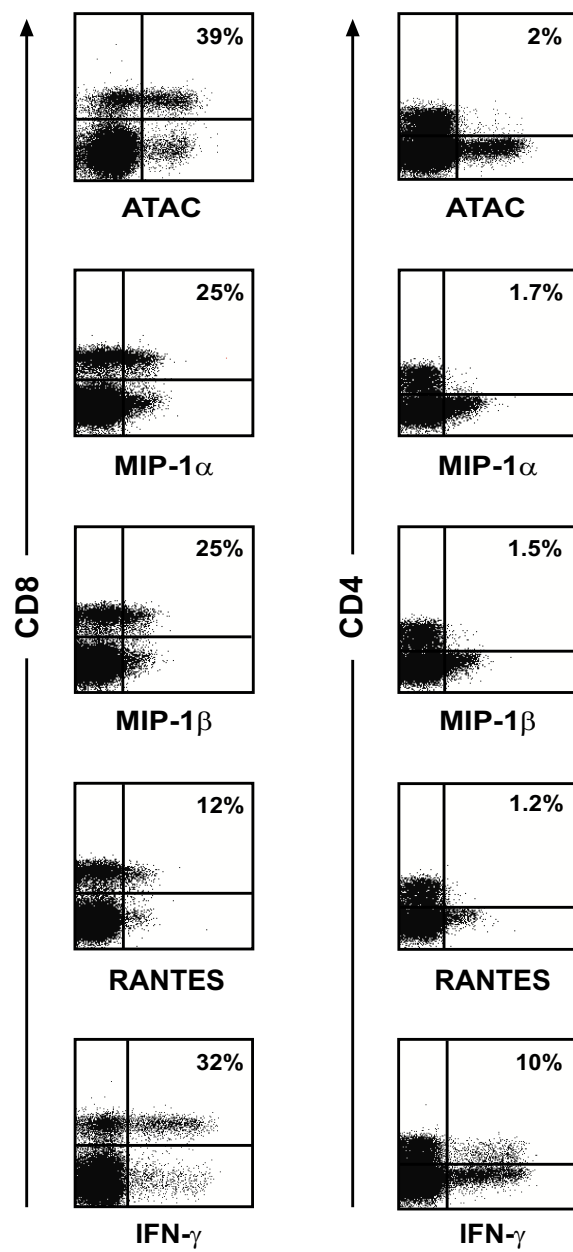**C**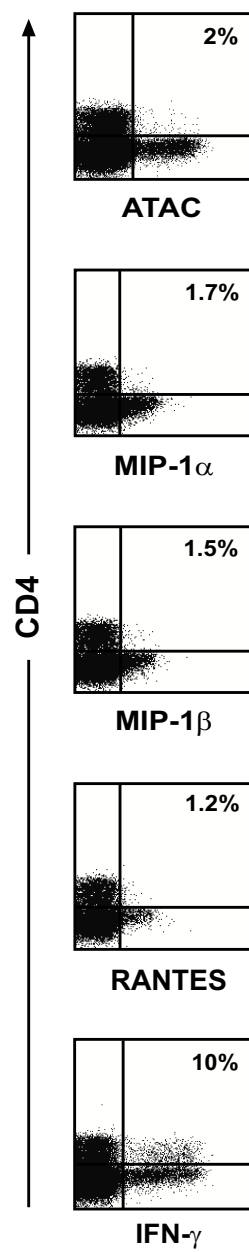

Supplement: pnas_092141999_4.pdf [file pnas_092141999_4.pdf]

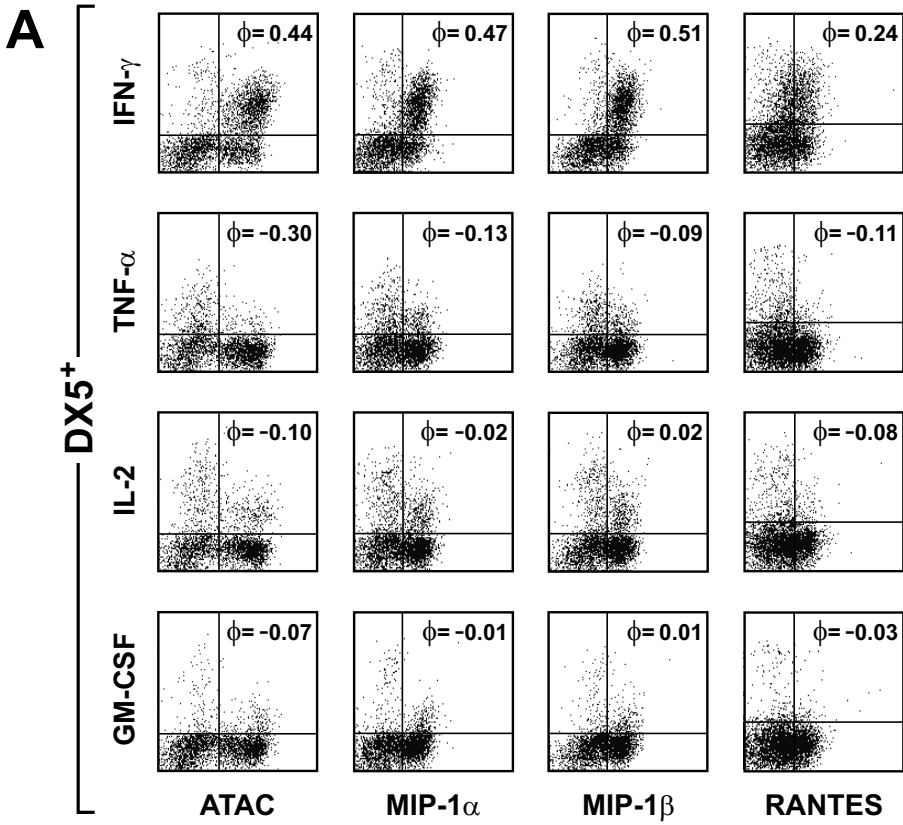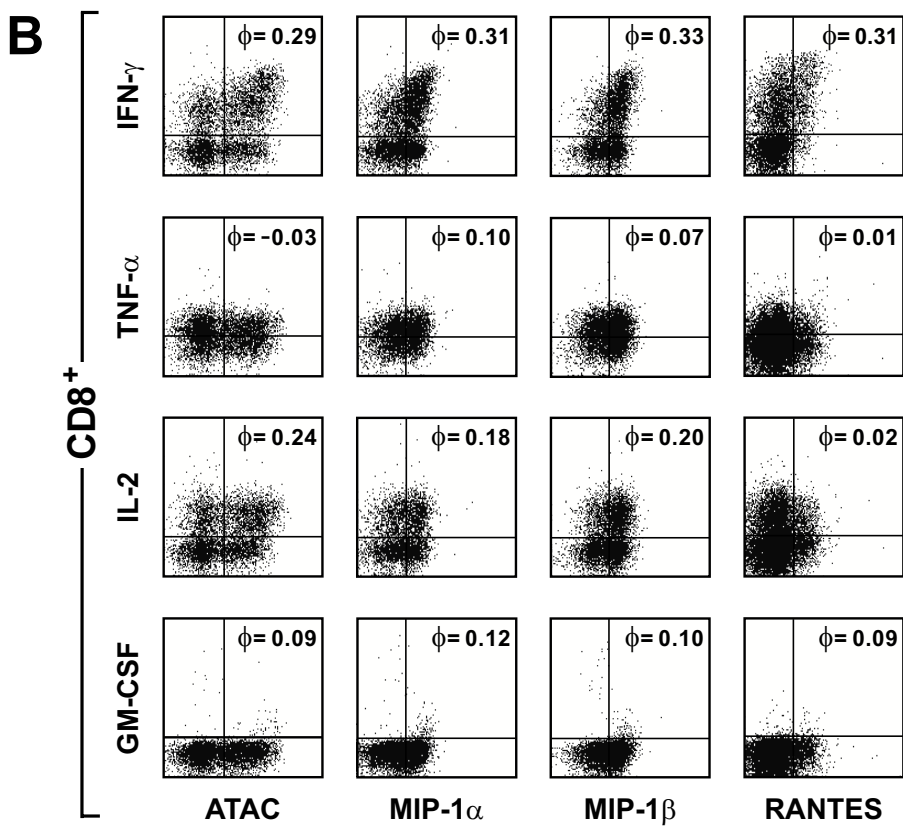

Supplement: pnas_092141999_5.pdf [file pnas_092141999_5.pdf]

**A**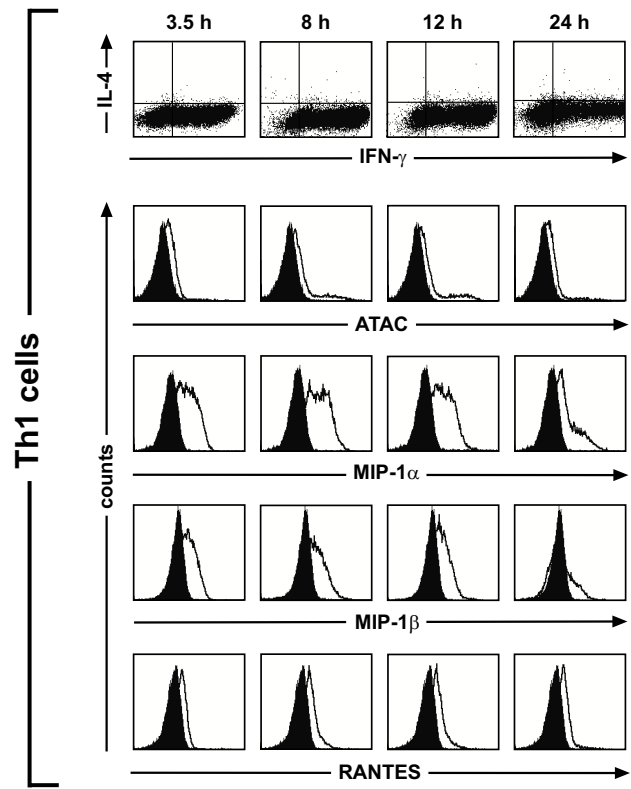**B**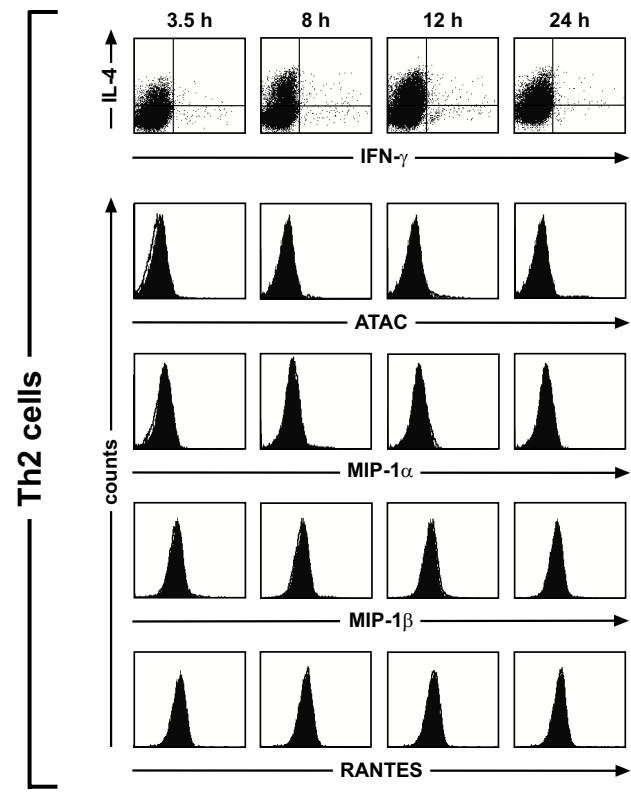

Supplement: pnas_092141999_6.pdf [file pnas_092141999_6.pdf]
